# Supplementary material
Source: PubMed Central journal article supplement (PMC3247164)
Supplement: NIHMS342896-supplement-01.pdf [file NIHMS342896-supplement-01.pdf]

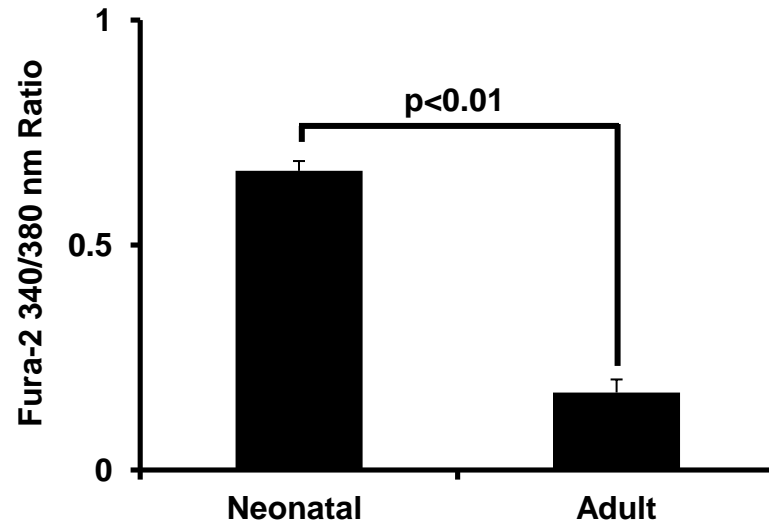

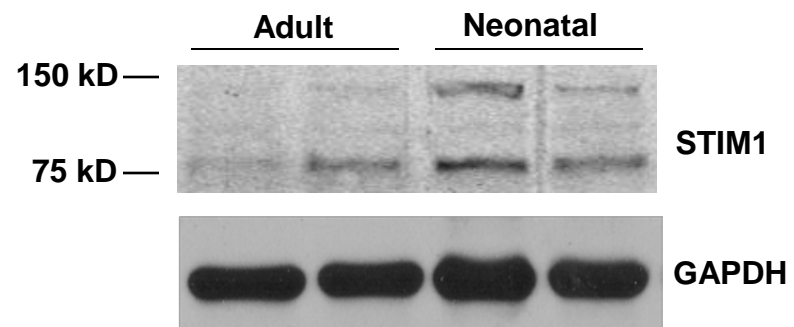

Supplemental Figure 2

IP: STIM1

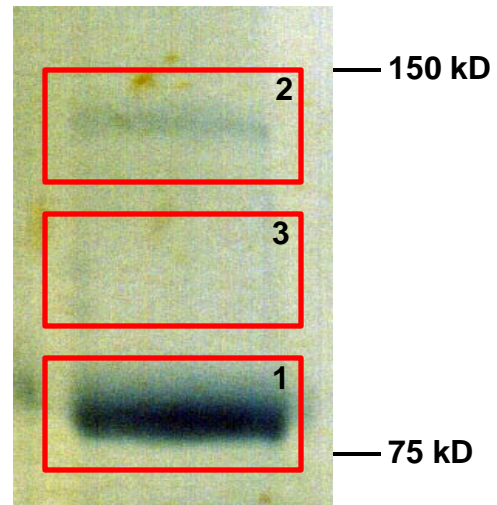

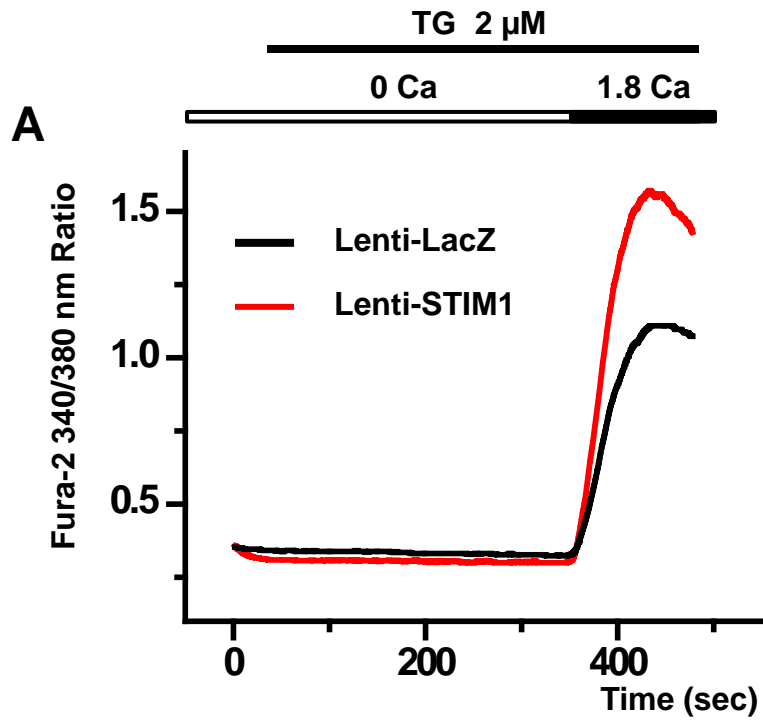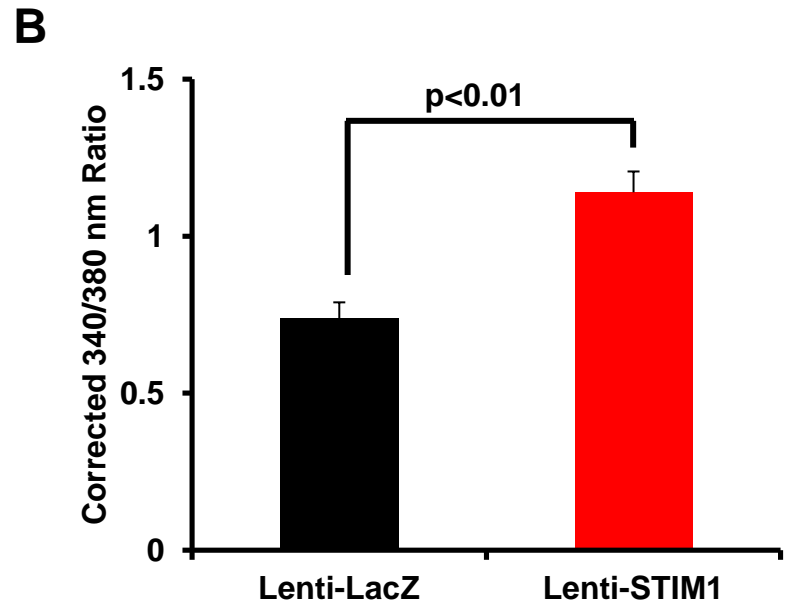

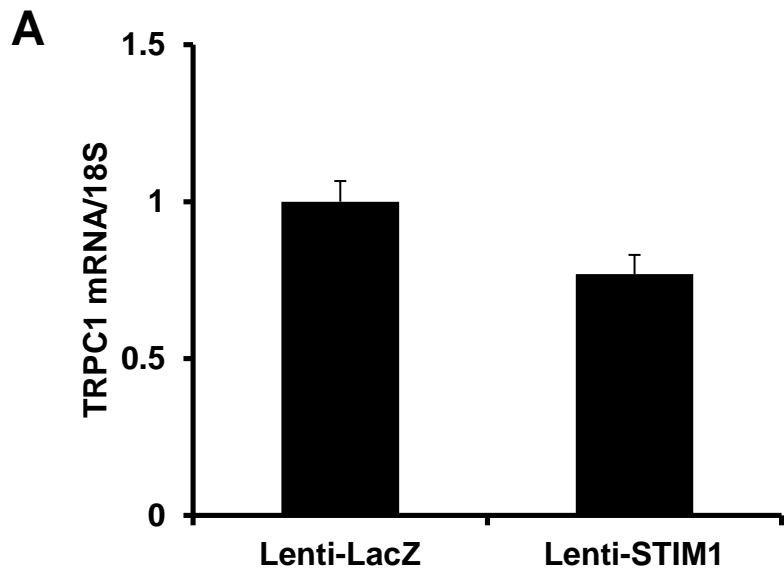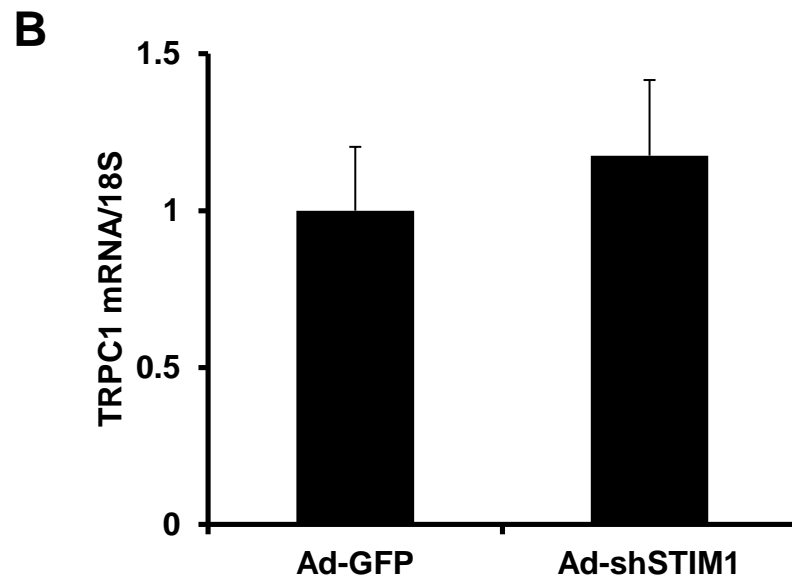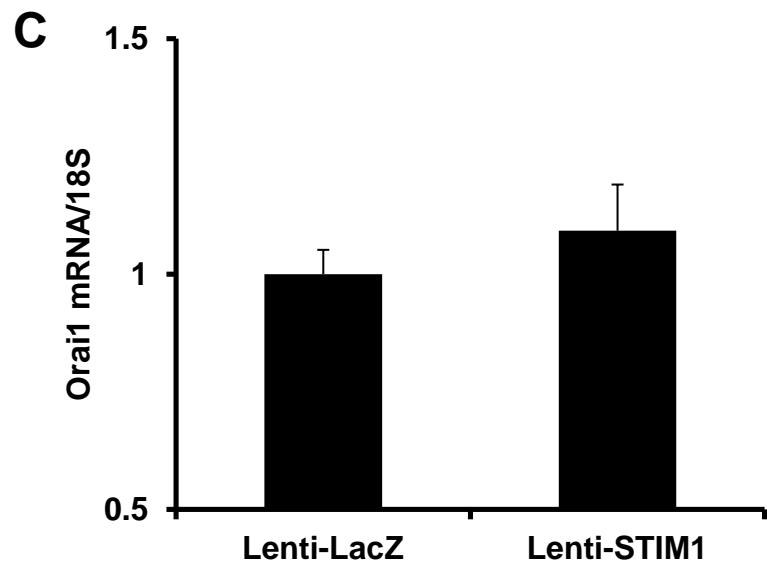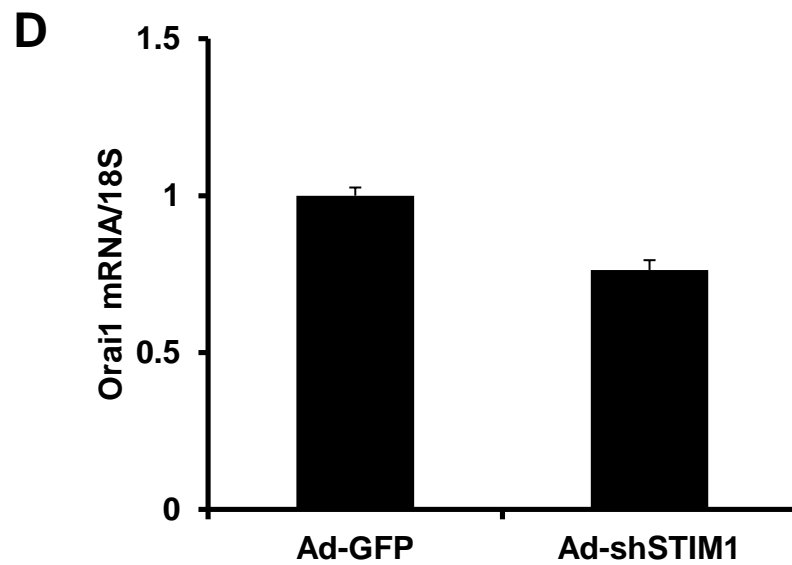

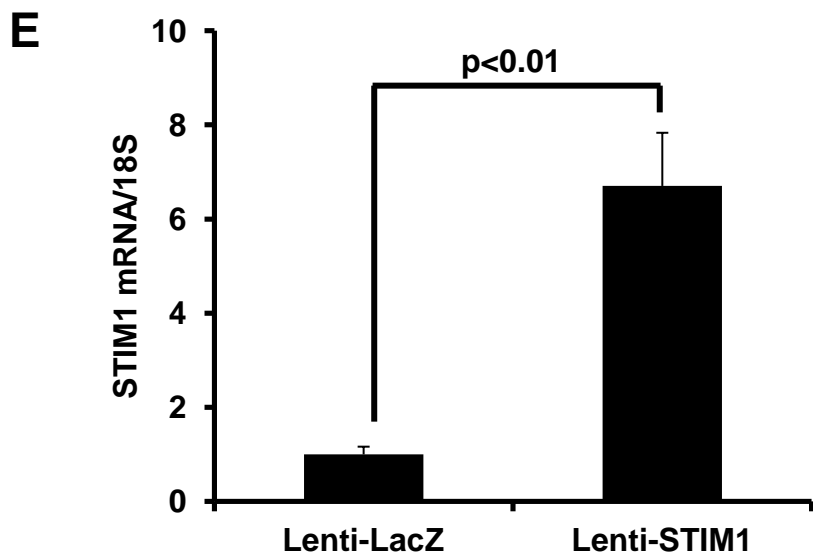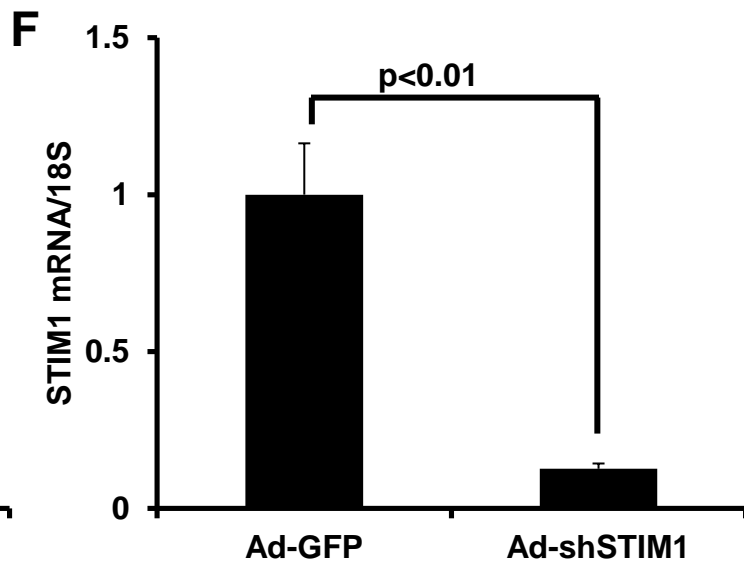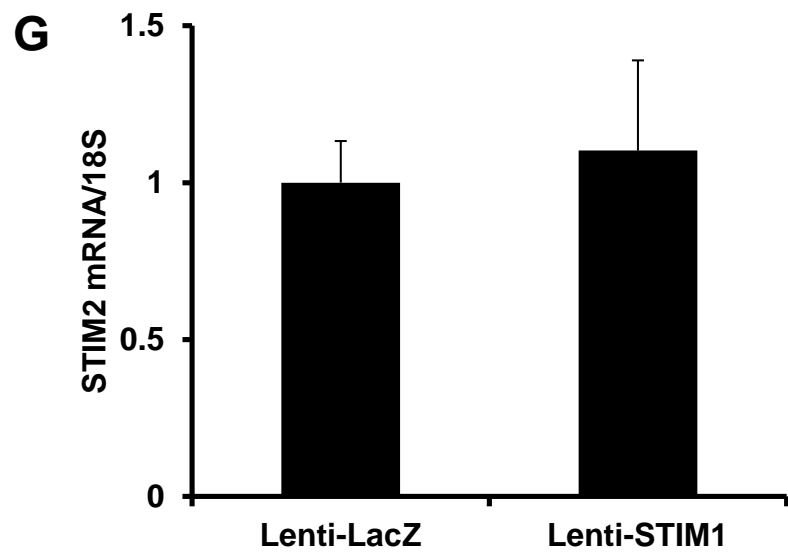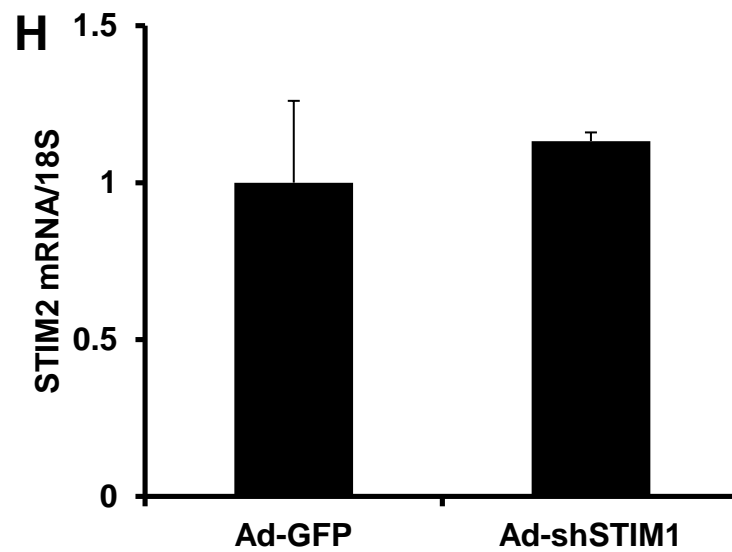

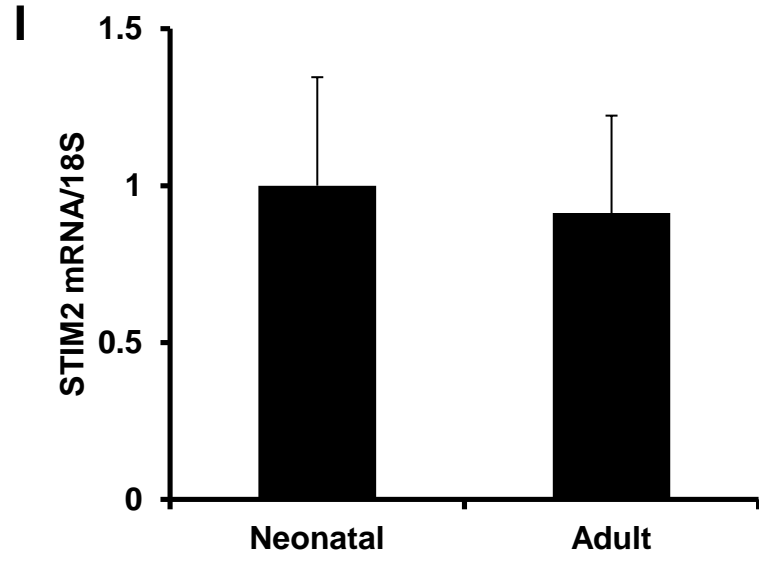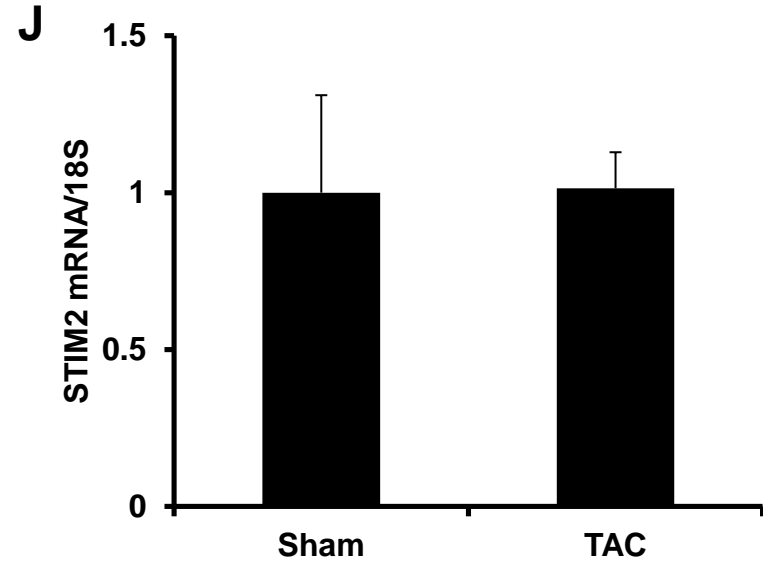

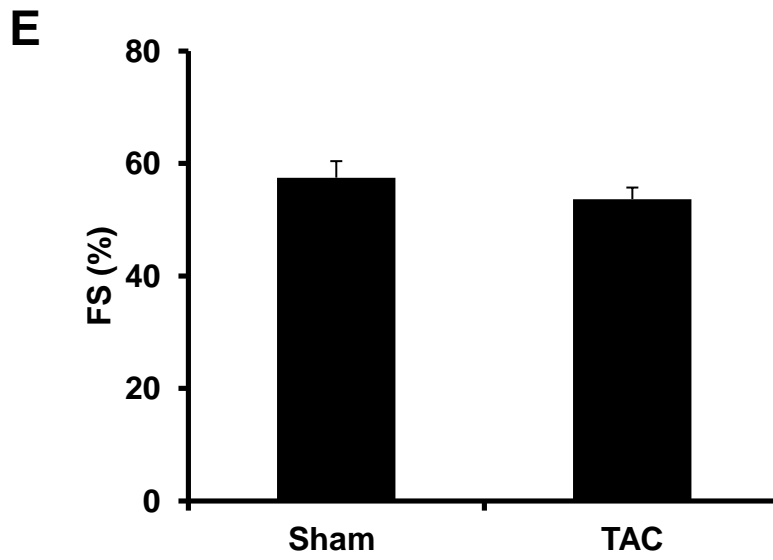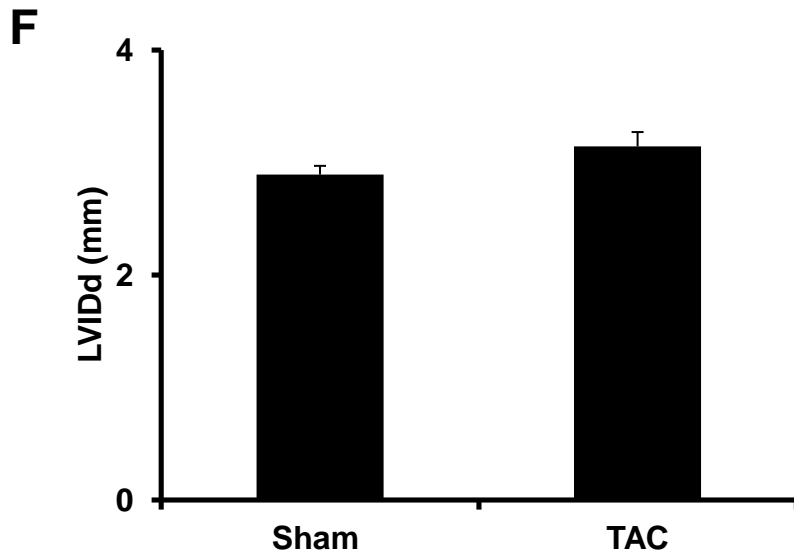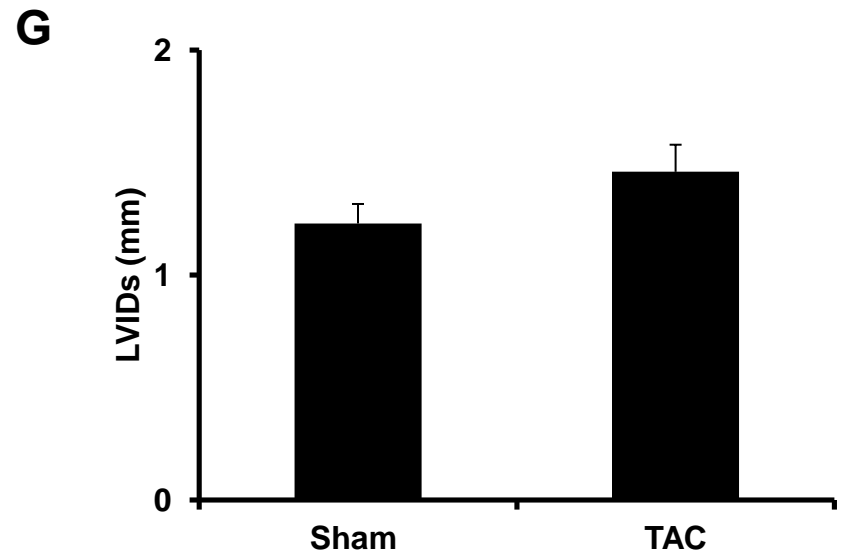



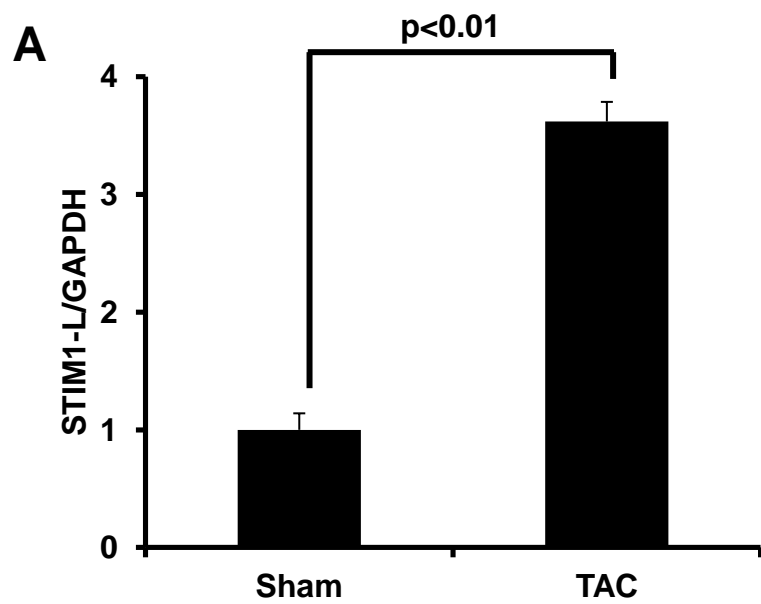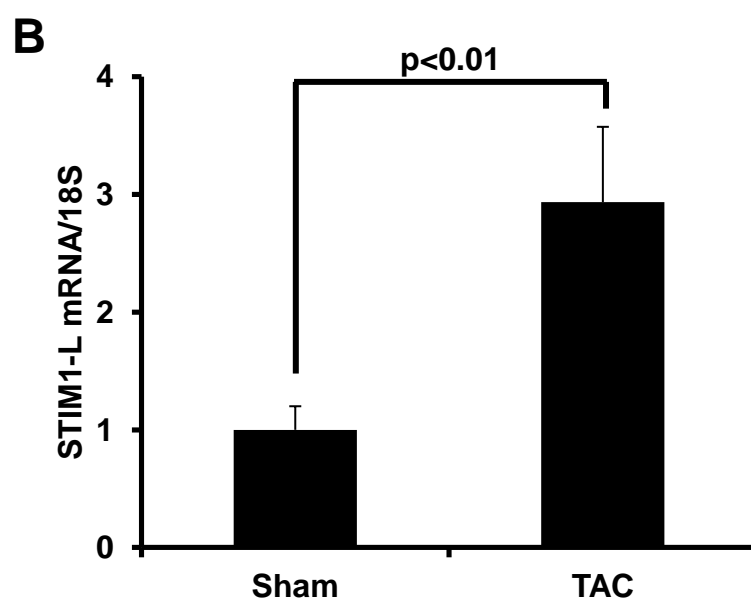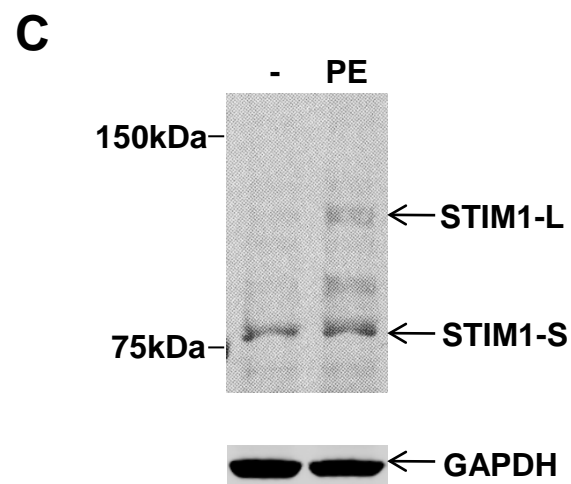

**A**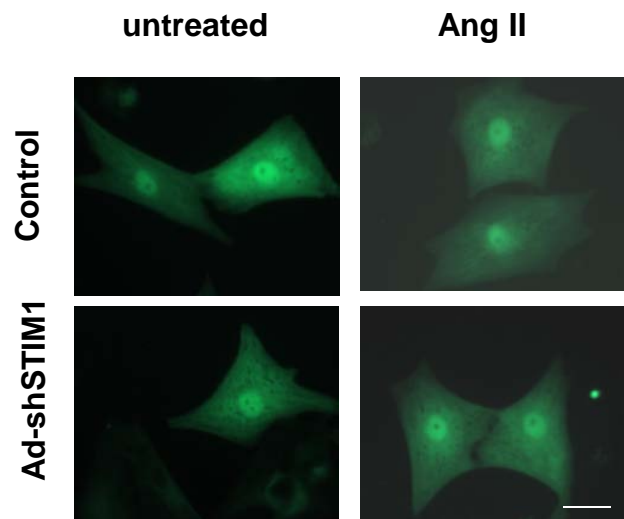**B**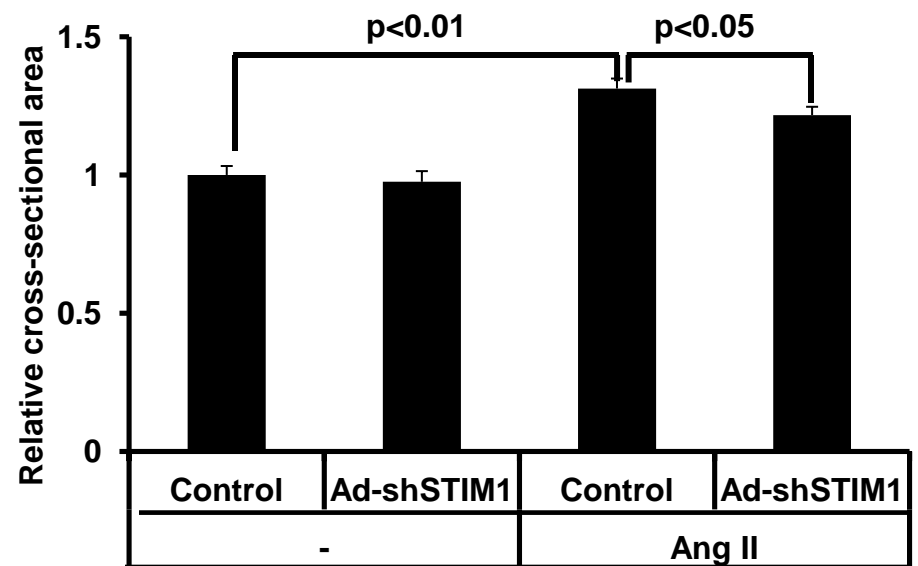

**A**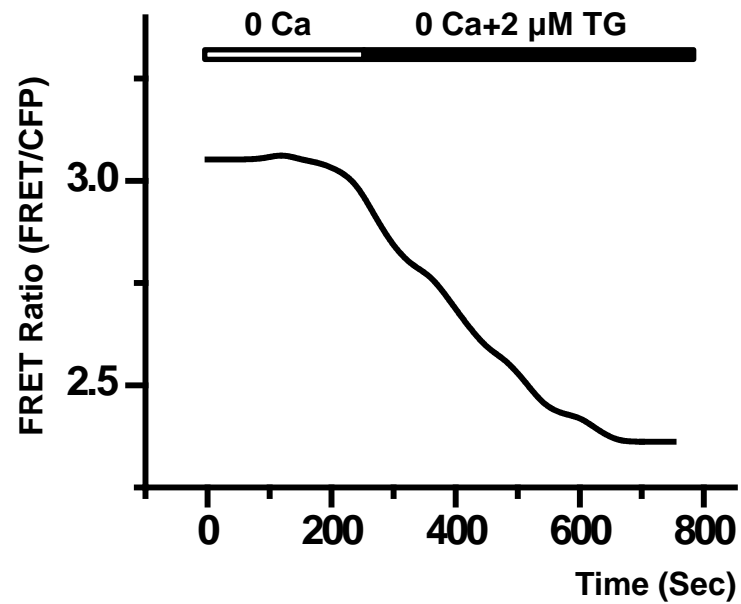**B**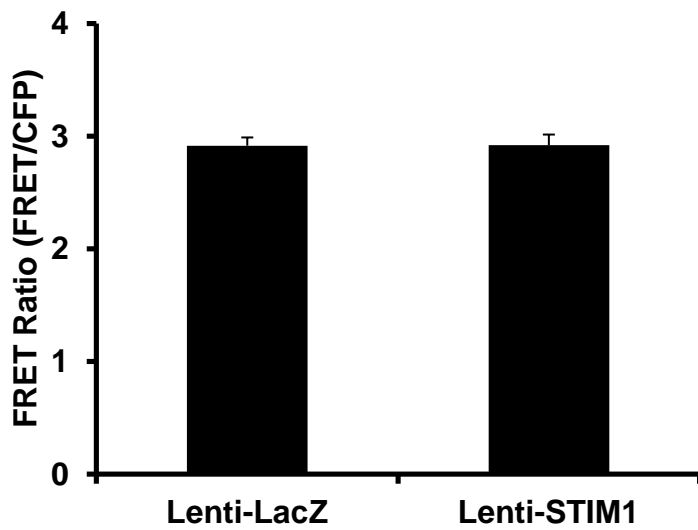**C**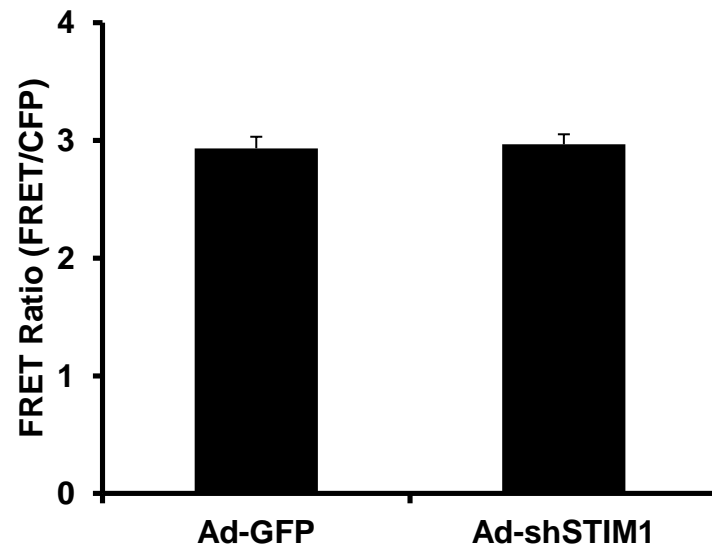

## ***Supplemental Data***

### ***Figure Legends***

**Supplemental Figure 1.** Quantitative analyses of detectable SOCE depicted as the corrected average peak  $\text{Ca}^{2+}$  levels in NRVMs (n=78) and adult cardiomyocytes (n=89). N=3-5 independent experiments.

**Supplemental Figure 2.** Specificity of the STIM1 antibody (#54680, AnaSpec, Inc.) used in this study was supported by additional Western blot analysis using an independent polyclonal STIM1 antibody (ProSci Inc., #4119). Similar results were obtained.

**Supplemental Figure 3.** Ventricular lysates from TAC mice were immunoprecipitated with STIM1 antibody and subjected to SDS-PAGE. Coumassie blue staining revealed two protein bands which were subjected to mass spectrometric analysis: Sample 1 (80 kD band), Sample 2 (130 kD band). As a control, a region between these two bands was analyzed (Sample 3).

**Supplemental Figure 4.** SOCE activity was increased in NRVMs with STIM1 over-expression. (A) Representative  $\text{Ca}^{2+}$  traces demonstrating SOCE in cultured NRVMs infected with lentivirus expressing LacZ and STIM1. (B) Quantitative analysis of SOCE depicted as the corrected average peak  $\text{Ca}^{2+}$  levels in lenti-LacZ or lenti-STIM1-infected NRVMs (n=20-22) from three independent experiments.

**Supplemental Figure 5.** STIM1 over-expression (A, C) or knockdown (B, D) provoked no difference by quantitative real-time RT-PCR in TRPC1 (A, C) or Orai1 (B, D) expression levels. Alteration in STIM1 levels (E, F) had no effect on STIM2 (G, H) in NRVMs with STIM1 over-expression (E, G) or knockdown (F, H). N=3 independent experiments. Additionally, no difference in STIM2 expression levels was detected in hearts between neonatal and adult (I), Sham and TAC mice (J).

**Supplemental Figure 6.** Cardiac function measured in Sham and TAC mice 3 weeks post-surgery (n=5-8). There were no significant difference in FS (A), left ventricular internal diameter

in diastole, LVIDd (**B**), and left ventricular internal diameter in systole, LVIDs (**C**) between two groups. FS, fractional shortening at the diastole; LVIDd, LV diastolic diameter; LVIDs, LV systolic diameter.

**Supplemental Figure 7.** Quantitative analyses of STIM1-L expression depicted in **Figure 4A** (**A**). Quantitative real-time RT-PCR analysis of STIM-L mRNA levels in Sham and TAC hearts (**B**). Western blot analysis showing STIM1-L is up-regulated in cultured ARVMs exposed to PE (50  $\mu$ M) for 36 hr (**C**).

**Supplemental Figure 8.** (**A**) Representative images of Ad-GFP- or Ad-shSTIM1-infected neonatal cardiomyocytes exposed to Ang II or vehicle; scale bar, 20  $\mu$ m. (**B**) Cell cross-sectional areas from experiments shown in panel C. Sixty to eighty randomly selected cells from each group were measured.

**Supplemental Figure 9.** D1ER signals from NRVMs shown as FRET ratio for ER  $\text{Ca}^{2+}$  content measurement, application of 2  $\mu$ M TG caused a rapid drop in FRET ratio, indicating a release of  $\text{Ca}^{2+}$  from the ER store (**A**). Basal ER  $\text{Ca}^{2+}$  content was not affected in NRVMs (n=11-14) with STIM1 over-expression (**B**) or knockdown (**C**) (3 independent experiments).

## **Supplemental Materials and Methods**

**Immunoprecipitation and Coumassie blue staining.** Left ventricular tissue lysates from Sham- and TAC-operated mice were extracted at 4°C in buffer containing Tris-buffered saline, 0.1% Triton X-100, 4% glycerol, 1mM DTT, 1mM EDTA, protease inhibitors (Roche), and phosphatase inhibitors (Sigma). Homogenates were passed over glass wool to remove DNA, and protein concentrations were determined using the Bio-Rad Bradford assay. Tissue extracts were incubated with STIM1 antibody (AnaSpec Inc.) at 4°C overnight on a shaking platform, followed by incubation with Protein A sepharose beads (Roche) overnight and washing 5 times with lysis buffer. Bound proteins were eluted by boiling 5 min in 20 µL 2x SDS-PAGE loading buffer. Protein gels were stained with 0.2% Brilliant Blue R250 for 1 hour, followed by washing with 30% methanol and kept in 0.5% acetic acid for mass spectrometry.

**Mass spectrometry.** Gel bands were excised and subjected to in-gel reduction, alkylation, and tryptic digestion using 10 ng/µL trypsin. The resulting tryptic peptides were extracted, dried, and cleaned in a C18 Zip-tip (Millipore). Peptides were separated in an LTQ-2D ion trap mass spectrometer (Thermo Scientific) equipped with a nano-electrospray ionization source, coupled with an Agilent 1100 nano-flow HPLC system and subjected to data-dependent tandem mass spectrometry analysis. The tandem mass spectra were searched against the *Mus musculus* entries of the NCBI-nr database using the search engine MASCOT (Version 2.2, Matrix Science).

**Proteomics analyses.** Data are reported as “protein score”, a measure of the statistical significance of a PMF (Peptide Mass Fingerprint) match. This commonly used measure of scoring mass spectrometry-derived protein identification (Version 2.2, Matrix Science) is calculated as  $-10 \cdot \log(P)$ , where P is the probability that the observed match is a random event. Protein scores greater than 67 are significant ( $p < 0.05$ ). Here, we employed a standard that only proteins with Mascot score  $> 150$  are considered reliable.

**ER Ca<sup>2+</sup> content measurement.** A fluorescence resonance energy transfer (FRET)-based chameleon Ca<sup>2+</sup> indicator D1ER was employed to measure ER Ca<sup>2+</sup> content in NRVMs. D1ER expression plasmid was kindly provided by Dr. Roger Tsien (University of California, San Diego) [1]. D1ER is composed of enhanced cyan fluorescent protein (ECFP) and citrin

fluorescent protein separated by a linker encoding calmodulin (CaM) and CaM-binding M13 peptide sequence. Calreticulin (CRT) targeting sequence (MLLPVLLLGLLGAAAD) was added to the N terminus, and an ER retention sequence (KDEL) was added to the C terminus of D1ER protein to facilitate ER targeting and retention [2].

Cultured NRVMs were transfected with D1ER plasmid and lenti-STIM1, Ad-shSTIM1 or control plasmids using FuGENE HD transfection reagent (Promega). Imaging experiments were performed 48h after transfection using a Deltavision RT wide-field epifluorescence deconvolution microscope (Applied Precision) equipped with a Photometrics CoolSNAPHQ monochromatic digital camera (Roper Scientific) controlled by the SoftWorx image acquisition software package (Applied Precision). The filter sets used for FRET imaging experiments were CFPx 436 nm/10 nm and yellow fluorescent protein (YFPx) 492 nm/18 nm for excitation (x) and CFPm 465 nm/30 nm and YFPm 535 nm/30 nm for emission (m). A series of three images CFPx/CFPm (CFP), YFPx/YFPm (YFP), and CFPx/YFPm (FRET) was acquired every 25 s. Analysis of the imaging data was performed using MetaMorph imaging software. ER  $\text{Ca}^{2+}$  content is expressed as FRET/CFP ratio.

***Primary culture of adult rat cardiomyocytes and adeno- or lenti-virus infection.***

Male Sprague-Dawley rats (250 g) were anesthetized with Euthasol (Virbac Corporation). Adult rat cardiomyocytes (ARVMs) were isolated by a retrograde aortic perfusion method. Briefly, the heart was removed, washed with Gerard medium (in mM, NaCl 128, KCl 4.0,  $\text{MgSO}_4 \cdot 7\text{H}_2\text{O}$  1.39,  $\text{NaH}_2\text{PO}_4$  0.19,  $\text{Na}_2\text{HPO}_4$  1.01, HEPES 10.0, glucose 5.5 and pyruvic acid 2.0 at 37 °C, pH 7.4 containing 10 mM 2,3-butanedione monoxime) and retroperfused with 0.12% (wt/vol) collagenase A (Roche) digestion buffer for 30 min. Digested heart was mechanically shattered in digestion buffer, and the supernatant was collected, the remaining tissues were further digested in a sterile flask for 10 min and the supernatants collected, then centrifuged at 500 rpm for 30 seconds. Pellets containing cardiac myocytes were resuspended in Gerard medium and followed by  $\text{Ca}^{2+}$  reintroduction, then plated on laminin-precoated dishes or coverslips. Following overnight incubation, cells were transferred to serum-free medium and used for adeno- or lenti-virus infection (multiplicity of infection 10).

## **References**

[1] Palmer AE, Jin C, Reed JC, Tsien RY. Bcl-2-mediated alterations in endoplasmic reticulum Ca<sup>2+</sup> analyzed with an improved genetically encoded fluorescent sensor. Proc Natl Acad Sci U S A. 2004;101:17404-9.

[2] Palmer AE, Tsien RY. Measuring calcium signaling using genetically targetable fluorescent indicators. Nat Protoc. 2006;1:1057-65.
